# Supplementary material for: Patients’ Perspective of Medication Adherence in Chronic Conditions: A Qualitative Study
Source: Springer Nature journal article supplement (doi:10.1007/s12325-016-0394-6), 2016-08-09
Supplement: MOESM1 [file 10568122]

## SUPPLEMENTARY MATERIAL

### Appendix 1. Discussion guide for focus groups.

| Dimension                                                                                                                                                                           | Questions                                                                                                                                                                                                                                                                                                                                                                                                                                                                                                                                           |
|-------------------------------------------------------------------------------------------------------------------------------------------------------------------------------------|-----------------------------------------------------------------------------------------------------------------------------------------------------------------------------------------------------------------------------------------------------------------------------------------------------------------------------------------------------------------------------------------------------------------------------------------------------------------------------------------------------------------------------------------------------|
| The life history of patients                                                                                                                                                        | <ul style="list-style-type: none"><li>• Patients are invited to introduce themselves to the rest of the group and to identify their age and health condition/s</li></ul>                                                                                                                                                                                                                                                                                                                                                                            |
| Patients' perception about drugs                                                                                                                                                    | <ul style="list-style-type: none"><li>• What is your experience with drug treatment?</li><li>• What positive and negative impacts of your pharmacological treatment in your daily life would you emphasize?</li></ul>                                                                                                                                                                                                                                                                                                                               |
| Beliefs and motivations about treatment                                                                                                                                             | <ul style="list-style-type: none"><li>• What are your concerns in the future about your health?</li><li>• What is your opinion about drugs?</li><li>• Do you think drugs improve your health?</li><li>• What other aspects do you consider that contribute to improving your health?</li></ul>                                                                                                                                                                                                                                                      |
| Subjective perception of medication adherence                                                                                                                                       | <ul style="list-style-type: none"><li>• Are you satisfied with your drug treatment?</li><li>• Do you consider that your drug treatment is tailored to your needs, preferences and lifestyle?</li><li>• Do you think you have good drug compliance? Why?</li><li>• Do you consider that the information received about your medications is understandable?</li></ul>                                                                                                                                                                                 |
| Medication adherence issues                                                                                                                                                         | <ul style="list-style-type: none"><li>• What are your more commonly difficulties in relation to your treatment?</li><li>• If a concern arises regarding to your treatment, how do you resolve it?</li></ul>                                                                                                                                                                                                                                                                                                                                         |
| Facilitators of medication adherence (socio-economic status, healthcare team and healthcare system, condition-related factors, therapy-related factors and patient-related factors) | <ul style="list-style-type: none"><li>• What kind of support have you received to follow your treatment?</li><li>• How have you been helped? What is your opinion on it?</li><li>• Do you buy over-the-counter (OTC) drugs in the community pharmacy? How often?</li><li>• Have you had a negative experience when taking a medicine? Did this situation lead you to leave the treatment?</li><li>• How would you define the medicines you take? Do you consider your drugs effective, safe and easy to take, easy to identify and so on?</li></ul> |
| Recommendations                                                                                                                                                                     | <ul style="list-style-type: none"><li>• What do you think would really help you to improve your adherence to treatment?</li></ul>                                                                                                                                                                                                                                                                                                                                                                                                                   |
